# Supplementary material for: The landscape of sex-differential transcriptome and its consequent selection in human adults
Source: PubMed Central journal article supplement (PMC5297171; doi:10.1186/s12915-017-0352-z), 2017-02-07
Supplement: 12915_2017_352_MOESM6_ESM.pdf [file 12915_2017_352_MOESM6_ESM.pdf]

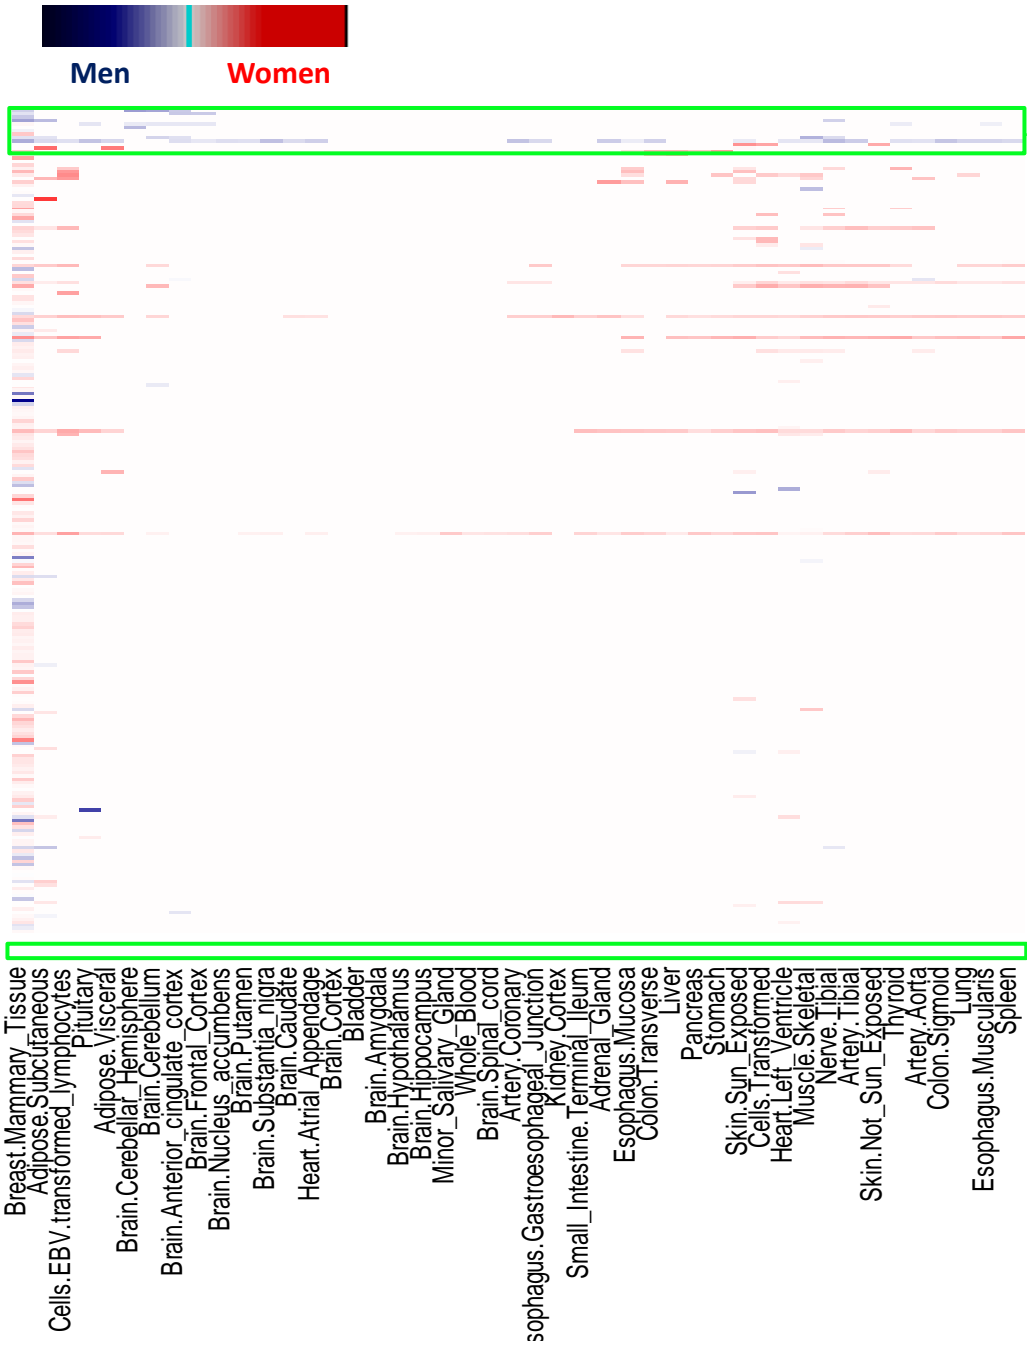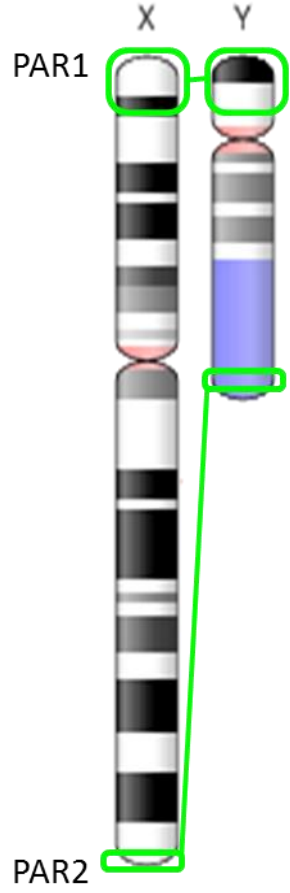

- Breast.Mammary\_Tissue
- Adipose.Subcutaneous
- Cells.EBV.transformed\_lymphocytes
- Pituitary
- Adipose.Visceral
- Brain.Cerebellar\_Hemisphere
- Brain.Cerebellum
- Brain.Anterior\_cingulate\_cortex
- Brain.Frontal\_Cortex
- Brain.Nucleus\_accumbens
- Brain.Putamen
- Brain.Substantia\_nigra
- Brain.Caudate
- Heart.Atrial\_Appendage
- Brain.Cortex
- Bladder
- Brain.Amygdala
- Brain.Hypothalamus
- Brain.Hippocampus
- Minor\_Salivary\_Gland
- Whole\_Blood
- Brain.Spinal\_cord
- Artery.Coronary
- sophagus.Gastroesophageal\_Junction
- Kidney.Cortex
- Small\_Intestine.Terminal\_ileum
- Adrenal\_Gland
- Esophagus.Mucosa
- Colon.Transverse
- Liver
- Pancreas
- Stomach
- Skin.Sun\_Exposed
- Cells.Transformed
- Heart.Left\_Ventricle
- Muscle.Skeletal
- Nerve.Tibial
- Artery.Tibial
- Skin.Not\_Sun\_Exposed
- Thyroid
- Artery.Aorta
- Colon.Sigmoid
- Lung
- Esophagus.Muscularis
- Spleen
