# Supplementary material for: The landscape of sex-differential transcriptome and its consequent selection in human adults
Source: PubMed Central journal article supplement (PMC5297171; doi:10.1186/s12915-017-0352-z), 2017-02-07

RPKM

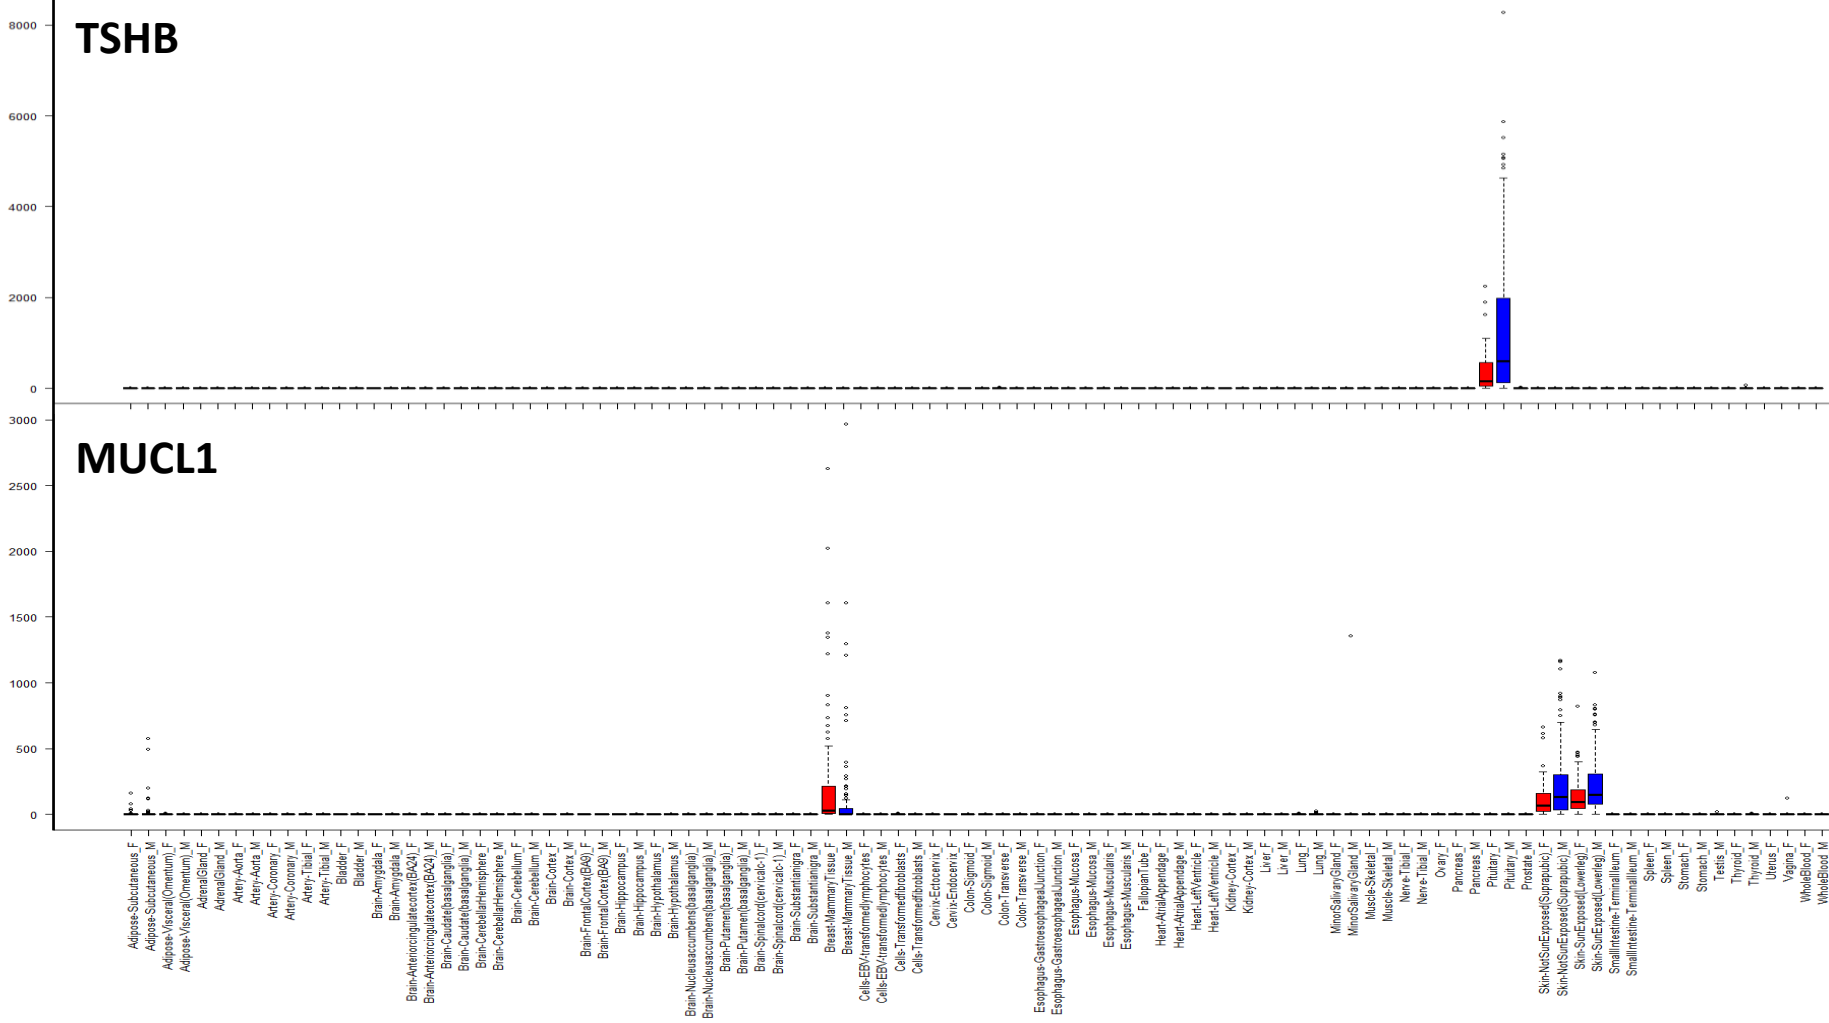

Supplement: 12915_2017_352_MOESM9_ESM.pdf [file 12915_2017_352_MOESM9_ESM.pdf]
