# Supplementary material for: The landscape of sex-differential transcriptome and its consequent selection in human adults
Source: PubMed Central journal article supplement (PMC5297171; doi:10.1186/s12915-017-0352-z), 2017-02-07

# Genes

Testis  
 Prostate  
 Brain.FrontalCortex  
 Brain.Anteriorcingulatecortex  
 Brain.Cortex  
 Thyroid  
 SmallIntestine.Terminalileum  
 Adipose.Subcutaneous  
 Nerve.Tibial  
 Artery.Tibial  
 Esophagus.Mucosa  
 AdrenalGland  
 Spleen  
 Brain.CerebellarHemisphere  
 Brain.Cerebellum  
 MinorSalivaryGland  
 Esophagus.GastroesophagealJunction  
 Esophagus.Muscularis  
 Artery.Coronary  
 Artery.Aorta  
 Colon.Sigmoid  
 Pancreas  
 Stomach  
 Lung  
 Adipose.Visceral  
 Heart.AtrialAppendage  
 Heart.LeftVentricle  
 Liver  
 WholeBlood  
 Muscle.Skeletal  
 Breast.MammaryTissue  
 Kidney.Cortex  
 Brain.Putamen  
 Brain.Caudate  
 Colon.Transverse  
 Brain.Substantianigra  
 Brain.Nucleusaccumbens  
 Brain.Hippocampus  
 Brain.Spinalcord  
 Cells.EBV.transformedlymphocytes  
 Pituitary  
 Brain.Hypothalamus  
 Brain.Amygdala  
 Bladder  
 Skin.NotSunExposed  
 Skin.SunExposed  
 Cells.Transformedfibroblasts  
 FallopianTube  
 Ovary  
 Cervix.Endocervix  
 Uterus  
 Vagina  
 Cervix.Ectocervix

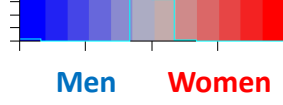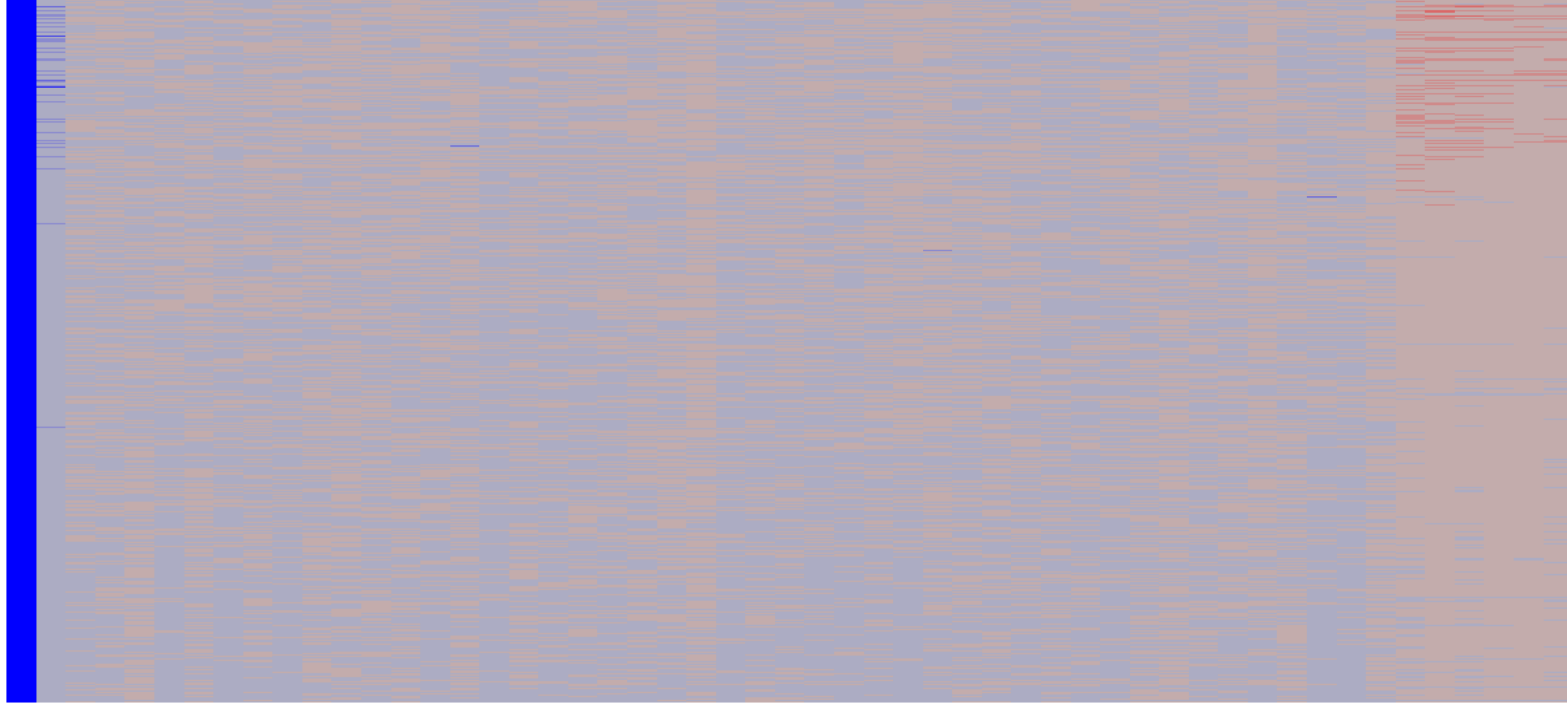

Supplement: 12915_2017_352_MOESM16_ESM.pdf [file 12915_2017_352_MOESM16_ESM.pdf]
